# Supplementary material for: An EPR study of ampullosporin A, a medium-length peptaibiotic, in bicelles and vesicles
Source: Royal Society of Chemistry journal article supplement (doi:10.1039/c5cp04136h), 2015-11-19
Supplement: c5cp04136h1.pdf [file c5cp04136h1.pdf]

## Supporting Information

for

### EPR Study of Ampullosporin A, a Medium-Length Peptaibiotic, in Bicelles and Vesicles

Marco Bortolus<sup>a,b</sup>, Annalisa Dalzini<sup>a</sup>, Fernando Formaggio<sup>a</sup>, Claudio Toniolo<sup>a</sup>, Marina Gobbo<sup>a\*</sup> and Anna Lisa Maniero<sup>a\*</sup>

<sup>a</sup>Dipartimento di Scienze Chimiche, Università degli Studi di Padova, 35131 Padova, Italy; <sup>b</sup>Dipartimento di Scienza dei Materiali, Università degli Studi di Milano Bicocca, 20126, Milano, Italy \*Corresponding authors. E-mail addresses: annalisa.maniero@unipd.it (A.L. Maniero); marina.gobbo@unipd.it (M. Gobbo)

#### 1. Analysis of the spectral dependence of the fitting of the EPR spectra of aligned bicelles on the angle $\Psi$

In Figure S1, we report the fitting of the spectra of **AmpT3** and **AmpT13** at different values of the angle  $\Psi$  from  $0^\circ$  to  $30^\circ$  (and from  $90^\circ$  to  $100^\circ$ ): no significant difference can be seen between  $0^\circ$  and  $10^\circ$ , while the fitting is definitely worse at  $30^\circ$ .

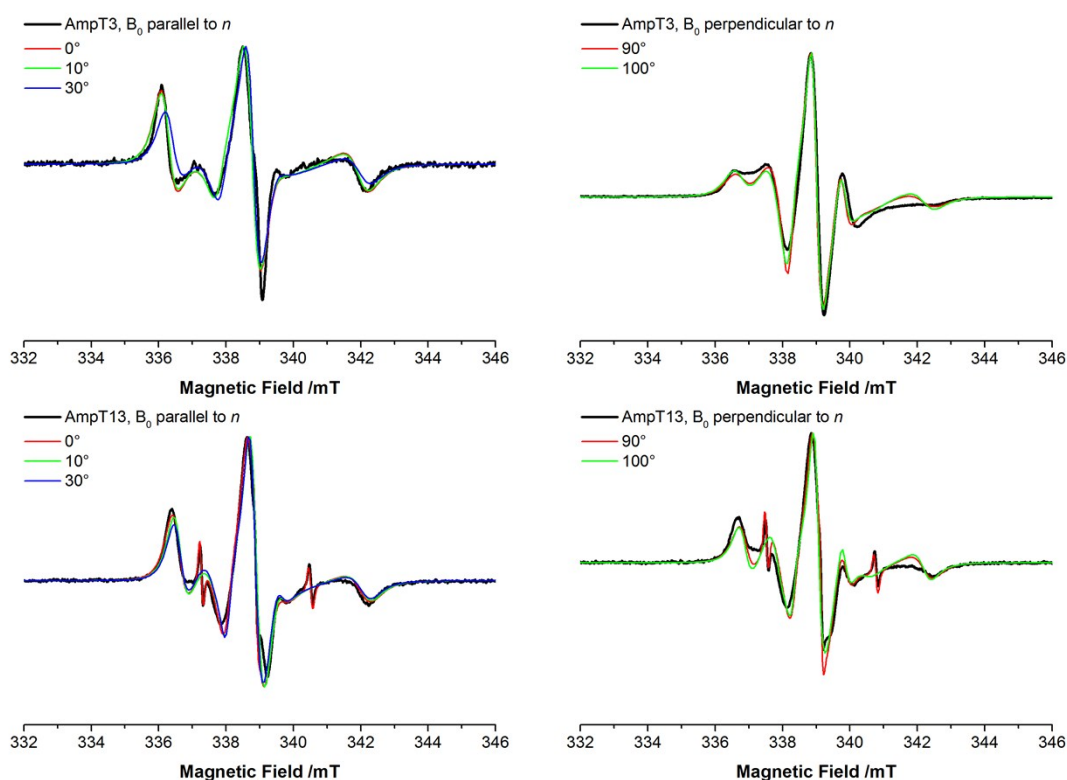

Figure S1

## 2. Detailed values of the P1/2 parameters from the saturation experiments

In Table S1 we report the values of the P1/2 obtained from the fitting of the individual saturation curves in separate experiments on **AmpT3** and **AmpT13**.

**Table S1**

| Peptide | P1/2 <sub>O2</sub> | P1/2 <sub>NiEdda</sub> | P1/2 <sub>N2</sub> | $\Phi$<br>P:L 1:100 | P1/2 <sub>O2</sub> | P1/2 <sub>NiEdda</sub> | P1/2 <sub>N2</sub> | $\Phi$<br>P:L 1:25 |
|---------|--------------------|------------------------|--------------------|---------------------|--------------------|------------------------|--------------------|--------------------|
| AmpT3   | 34.3               | 117.6                  | 12.0               | -1.6                | 19.4               | 14.9                   | 13.0               | 1.2                |
|         | 36.6               | 97.7                   | 17.3               | -1.4                | 38.7               | 19.5                   | 9.3                | 1.1                |
| AmpT13  | 67.0               | 36.8                   | 12.6               | 0.8                 | 83.5               | 18.5                   | 6.5                | 1.9                |
|         | 52.2               | 39.7                   | 22.0               | 0.5                 | 42.0               | 15.5                   | 7.9                | 1.5                |

## 3. Calibration curve for the absolute membrane depth

The  $\Phi$  parameter can be used to assess the distance from the membrane surface of a solute (R, in nm), provided a calibration curve is calculated. Below, in Figure S2, we show the linear regression plot: the curve has been calculated starting from the known depths of spin labeled phospholipids, considering the X-ray/NMR column from Table 1 in ref.[Dalton, L. A., McIntyre, J. O., and Fleischer, S. (1987), *Biochemistry* 26, 2117-2130].

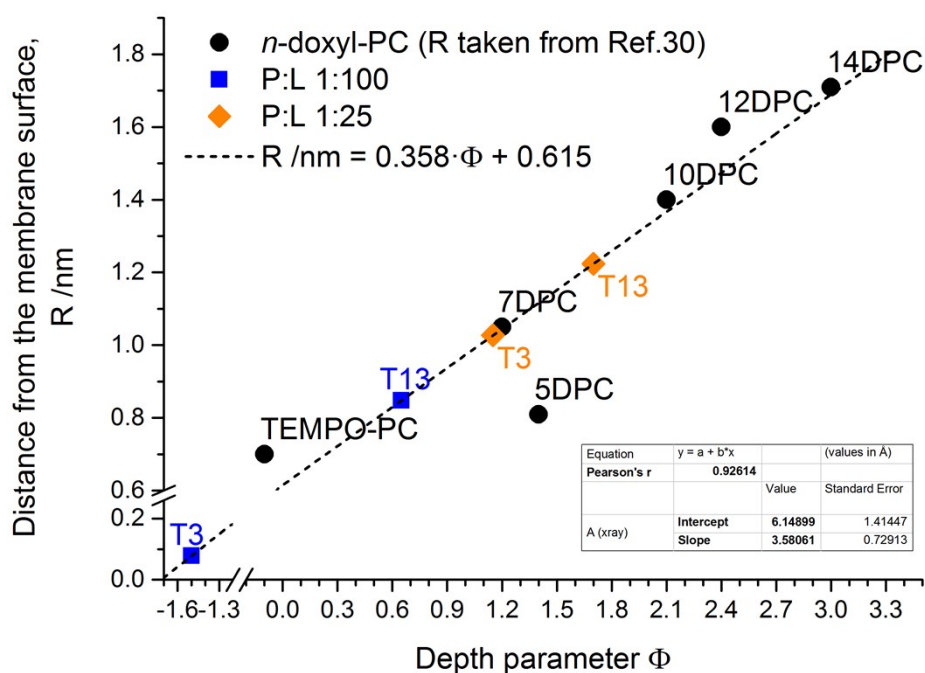

**Figure S2**

#### 4. Spectra of bicelles labeled with 5DPC interacting with Amp

In Figure S3, we report the EPR spectra of oriented bicelles labeled with 5DPC and interacting with **Amp** (unlabeled) at a 1:100 P:L ratio. The spectra have been prepared and have been aligned in the same way as those of unlabelled bicelles interacting with **AmpT3** and **AmpT13**. As can be seen from the Figure, the spectra taken with the magnetic field parallel or perpendicular to the membrane normal  $n$  are very different from each other, confirming the very good alignment of the samples.

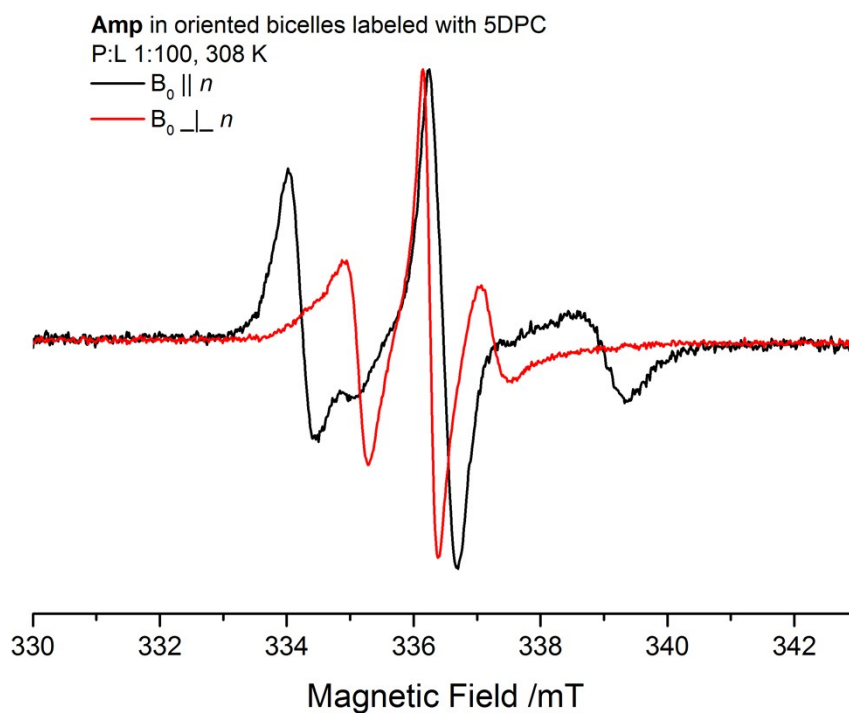

Figure S3
